# Supplementary material for: Chlorine Reduction Kinetics and its Mass Balance in Copper Premise Plumbing Systems During Corrosion Events
Source: Materials (Basel). 2019 Nov 8;12(22):3676. doi: 10.3390/ma12223676 (PMC6887719; doi:10.3390/ma12223676)
Supplement: Supplementary file 1 [file materials-12-03676-s001.pdf]

Supplementary

# Chlorine Reduction Kinetics and its Mass Balance in Copper Premise Plumbing Systems During Corrosion Events

Ignacio T. Vargas <sup>1,2,\*</sup>, Javiera M. Anguita <sup>2</sup>, Pablo A. Pastén <sup>1,2</sup> and Gonzalo E. Pizarro <sup>2</sup>

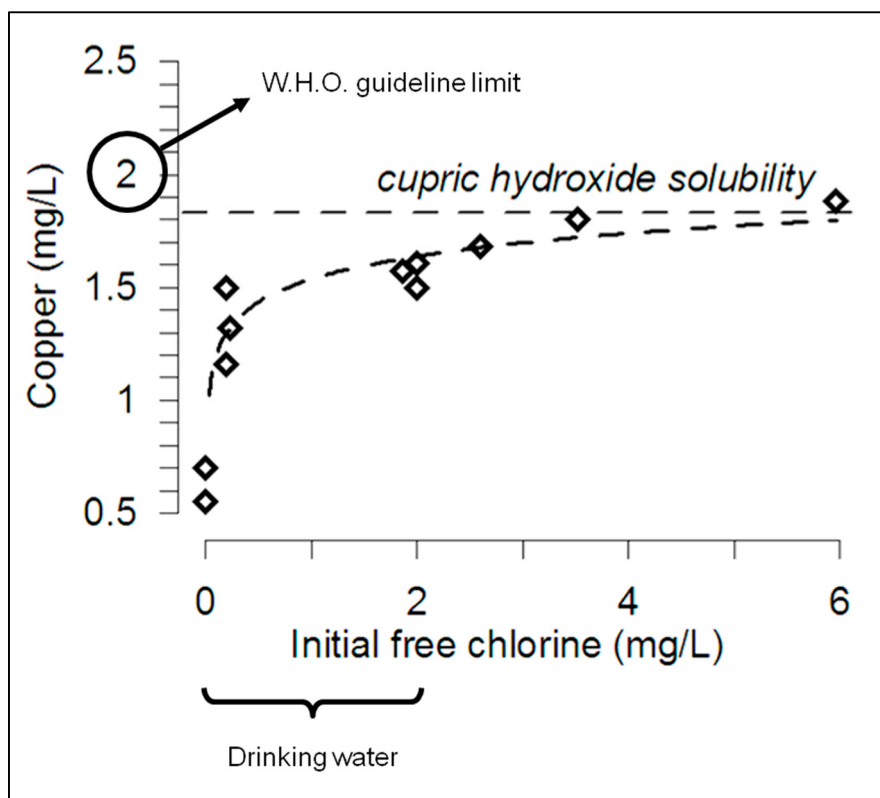

**Figure S1.** Copper release measurements in pipes with water at different chlorine concentration after 8 h of stagnation. Although copper release depends on the initial chlorine concentration, copper concentration is controlled by the solubility of corrosion by-products. According to thermodynamic calculations based on water chemistry parameters of the experiments, cupric hydroxide controls copper solubility at 1.8 mg/L. In all experiments, copper in water does not reach the W.H.O. guideline limit of 2 mg/L, in particular for typical chlorine concentrations in drinking water (0.2–2 mg/L).

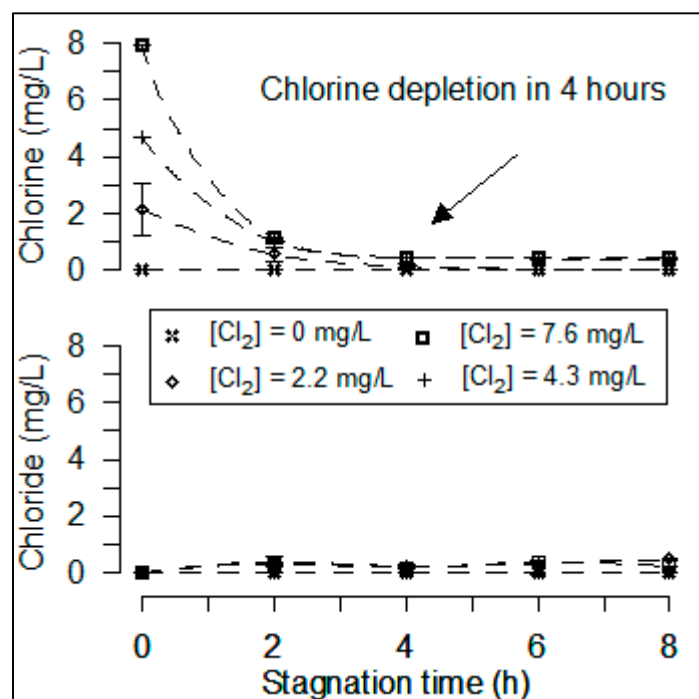

**Figure S2.** Pipe tests conducted with different initial concentrations of free chlorine. Results of chlorine consumption indicate that after approximately 4 hours, chlorine added with disinfection purposes is depleted. Measurements of chloride during stagnation suggest that most of the free chlorine is reduced to chloride precipitated during stagnation.

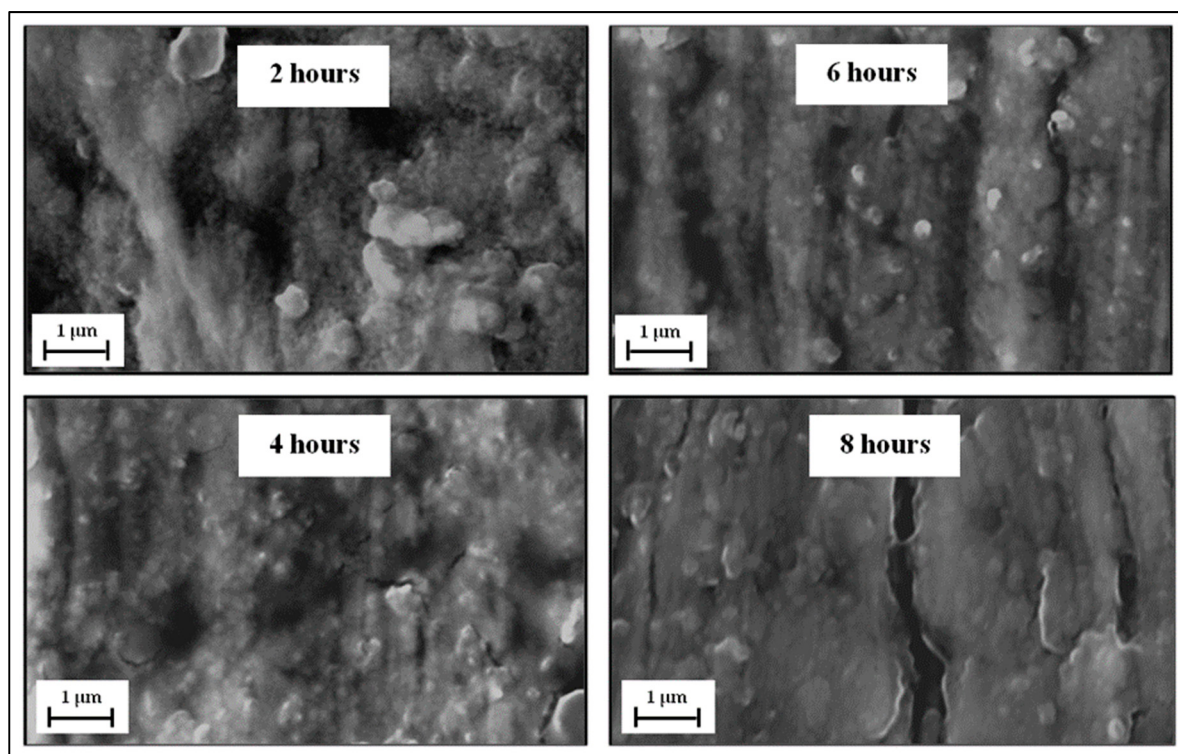

**Figure S3.** Scanning electron microscopy (SEM) images of new copper pipes in stagnant conditions with synthetic water (chlorine concentration of 4 mg/L, DIC of 80 mg as  $\text{CaCO}_3$ , and pH 7.2). Images show homogeneous superficial films (identified by GI-XRD as mainly malachite).

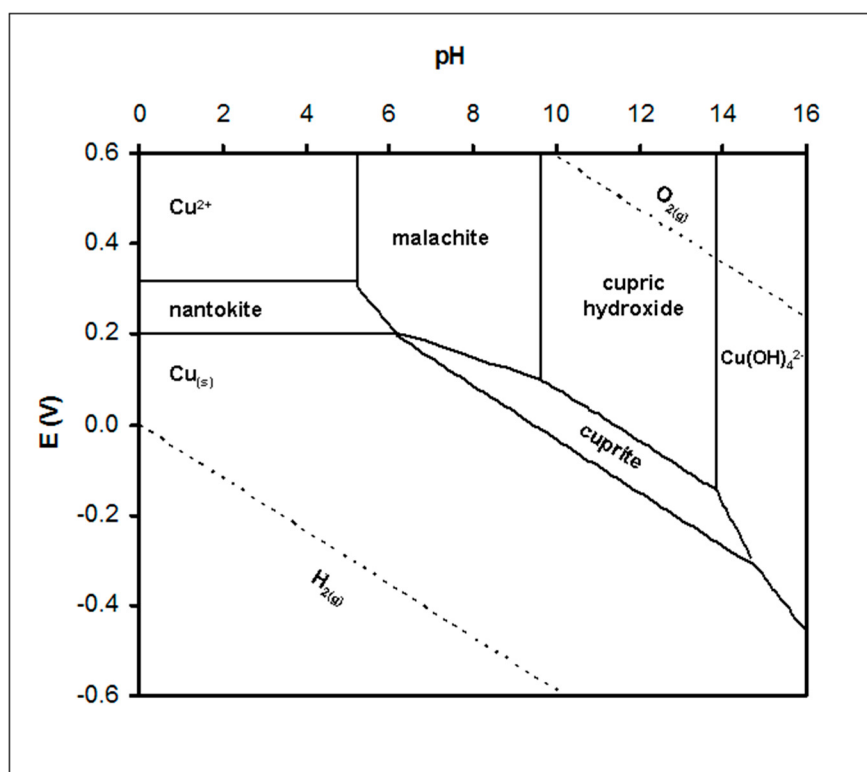

**Figure S4.** Pourbaix diagram of the corrosion by-products formed on the metallic surface of a copper-chlorine-carbonate system at 25 °C (respect to SHE). Concentrations increased  $10^3$  times in order to simulate high availability of hydrogen ion, chloride, and dissolved inorganic carbon at the metal-liquid interface.

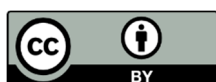

© 2019 by the authors. Submitted for possible open access publication under the terms and conditions of the Creative Commons Attribution (CC BY) license (<http://creativecommons.org/licenses/by/4.0/>).
